# Supplementary material
Source: MDPI journal article supplement (https://www.mdpi.com/1996-1073/15/7/2665)
Supplement: s1 [file s1]

Supporting Information

# Novel Terahertz Spectroscopy Analysis for the Electrode with Carbon Nanotubes (CNTs) in Lithium-Ion Batteries

Jiseong Kim <sup>1,†</sup>, Gyeong Bok Jung <sup>2,†</sup>, Da Bin Park <sup>1</sup>, Minki Jo <sup>1</sup>, Nan Ei Yu <sup>3,4</sup>, Byungwoo Son <sup>5</sup>, Pilgun Oh <sup>6</sup> and Yoonkook Son <sup>1,\*</sup>

<sup>1</sup> Department of Electric Engineering, Chosun University, 309, Pilmun-daero, Dong-gu, Gwangju, 61452, Korea

<sup>2</sup> Department of Physics Education, Chosun University, 309, Pilmun-daero, Dong-gu, Gwangju, 61452, Korea

<sup>3</sup> Advanced Photonics Research Institute, Gwangju Institute of Science and Technology (GIST), Gwangju, 61005, Korea

<sup>4</sup> Advanced Center for Photon Science Technology, Gwangju Institute of Science and Technology (GIST), Gwangju, 61005, Korea

<sup>5</sup> Department of Physics and Photon Science, Gwangju Institute of Science and Technology (GIST), Gwangju, 61005, Korea

<sup>6</sup> Department of Graphic Arts Information Engineering, Pukyong National University, Busan 485471, Korea

\* Correspondence: y\_son@chosun.ac.kr

† These authors contributed equally to this work.

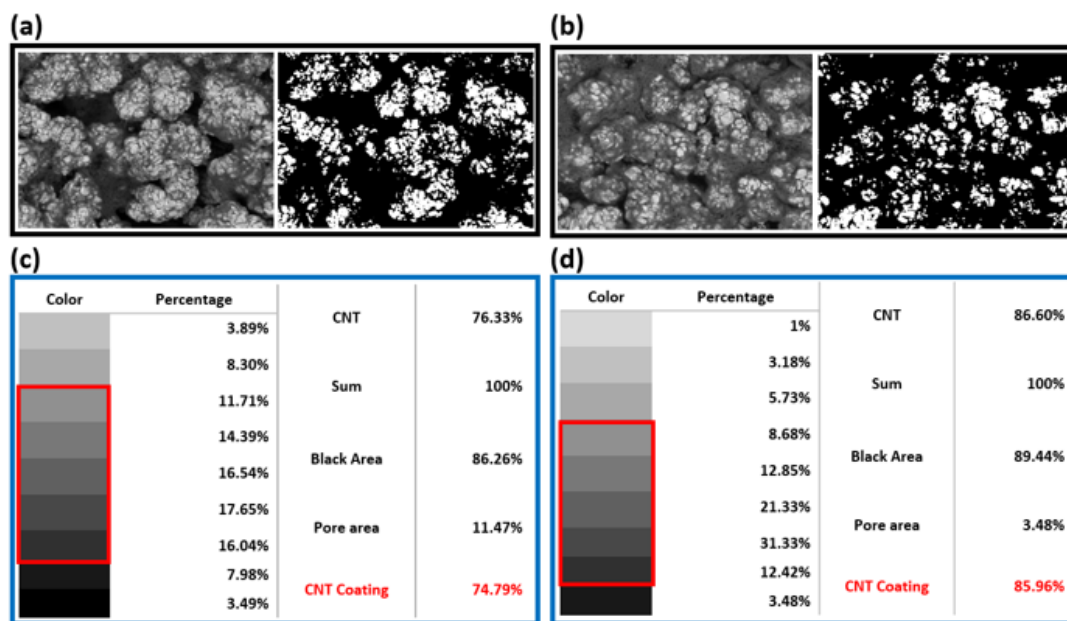

**Figure S1.** SEM and BSE images of (a) Sample A and (b) Sample C. (c and d) Collected data and calculated results based on color composition ratios from SE and BSE signals.

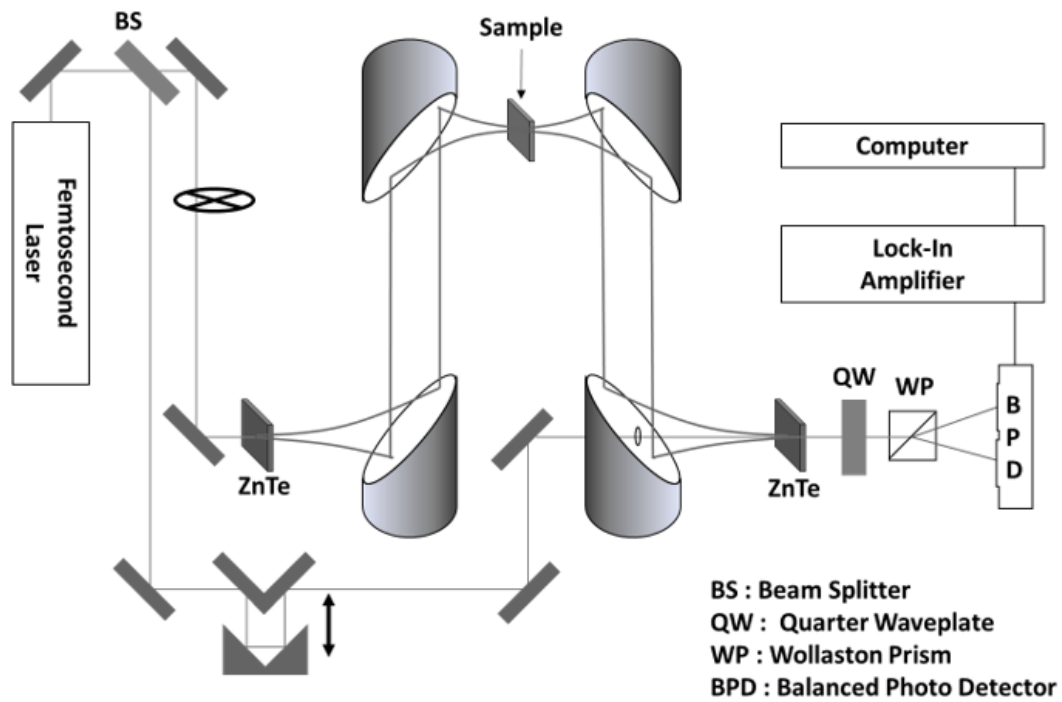

**Figure S2.** Schematic diagram of Terahertz-Time Domain Spectroscopy (THz-TDS) measurement.
